# Supplementary material
Source: bioRxiv or medRxiv preprint supplement (http://medrxiv.stage.highwire.org/highwire/filestream/97322/field_highwire_adjunct_files/0/2020.09.16.20194571-1.pdf)

**Supplements to “Mortality outcomes with hydroxychloroquine and chloroquine in COVID-19: an international collaborative meta-analysis of randomized trials”**

- 1. Search strategy**
- 2. Template for invitation email**
- 3. Table S1. Group-level characteristics of unavailable trials**
- 4. Table S2A. Subgroup analyses**
- 5. Table S2B. Sensitivity analyses**
- 6. Figures S1A-C. Forest plots for sensitivity analyses**

## Supplement 1. Search strategy

The COVID-evidence database includes trials registered on ClinicalTrials.gov or the WHO International Clinical Trials Registry Platform up to June 11, 2020, as well as trials published on the following sources up to April 9, 2020: PubMed, medRxiv, bioRxiv, the WHO COVID-19 literature database, and a listing of all trials with ethical approval in Switzerland (for details please see the COVID-evidence study protocol on the Open Science Framework: <http://dx.doi.org/10.17605/OSF.IO/GEHFX>).

This Supplement describes the search strategy used to complement the COVID-evidence database with trials registered or published after April 9, 2020.

PubMed and the Cochrane COVID-19 trial registry were searched from inception to June 11, 2020. Search terms included extensive controlled vocabulary and Medical Subject Headings (MeSH). Search terms were the following: corona[ti] OR covid\*[ti] OR sars[ti] OR severe acute respiratory syndrome[ti] OR ncov\*[ti] OR "severe acute respiratory syndrome coronavirus 2" [Supplementary Concept] OR "COVID-19" [Supplementary Concept] OR (wuhan[tiab] AND coronavirus[tiab]) OR (wuhan[tiab] AND pneumonia virus[tiab]) OR COVID19[tiab] OR COVID-19[tiab] OR coronavirus 2019[tiab] OR SARS-CoV-2[tiab] OR SARS2[tiab] OR SARS-2[tiab] OR "severe acute respiratory syndrome 2"[tiab] OR 2019-nCoV[tiab] OR (novel coronavirus[tiab] AND 2019[tiab]) NOT (animals[mesh] NOT humans[mesh]) AND ("2019/12/01"[EDAT] : "3000/12/31"[EDAT]) AND (((hydroxychloroquine[MeSH Terms]) OR (chloroquine[MeSH Terms])) OR (hydroxychloroquine[Title/Abstract])) OR (chloroquine[Title/Abstract]) AND (randomized controlled trial[pt] OR controlled clinical trial[pt] OR randomized[tiab] OR placebo[tiab] OR clinical trials as topic[mesh:noexp] OR randomly[tiab] OR trial[ti] NOT (animals[mh] NOT humans [mh]))

The search was updated on September 14, 2020.

## Supplement 2. Template for invitation email

Subject: Invitation to co-author a large-scale international collaborative meta-analysis on mortality in COVID-19 trials

Dear Dr. <last name>,

We are currently conducting a large-scale international collaborative meta-analysis on mortality in all ongoing or completed randomized clinical trials evaluating hydroxychloroquine or chloroquine for COVID-19. We are inviting all research groups worldwide testing these drugs to provide urgently needed evidence. We have no commercial interest with this work and aim to rapidly publish the results in a peer-reviewed journal. **Your core team is invited to co-author the publication.**

We use our COVID-evidence database ([www.covid-evidence.org](http://www.covid-evidence.org)) for this work. COVID-evidence is supported by the Swiss National Science Foundation (Project ID 196190) and a large collaboration of researchers from Switzerland, the US, China, Canada, UK, France, Germany, Austria, Sweden, Netherlands, and other countries. Our registered protocol can be found **attached** as well as registered on the Open Science Framework: [[link](#)]. Trials that are eligible for this project can be found at the end of the protocol.

Your study <url> is of high importance for this project. We would like to ask you how many patients died in your trial (see short questions below). We will use standard methods of meta-analysis and focus only on group-level (aggregated) mortality (no individual patient data needed). We will not do an in-depth review of the included trials as we aim to rapidly provide results, ideally from all trials worldwide. We describe the details of the study in the attached protocol.

**For the meta-analysis, we kindly ask you to answer the following questions before July 7. If you are interested in collaborating, please let us know of your interest as soon as possible.**

---

**Question 1:** Could you please confirm that these criteria apply to your trial?

- a) The trial is randomized and started enrollment before June 1, 2020
- b) The trial has at least one group of patients who receive hydroxychloroquine or chloroquine
- c) The trial has at least one control group that does not receive hydroxychloroquine or chloroquine

**Question 2:** For each of your study arms,

- a) What intervention did this group receive?
- b) How many patients were randomized to this group?
- c) Of these patients, how many have died?
- d) Of these patients, for how many it is unknown if they are dead or alive?

---

Please note that we are interested in these raw numbers regardless of the results of any statistical test. The numbers will be used to finalize the manuscript described in our registered protocol (attached).

We strive for a rapidly available, maximally informative publication with full transparency on methods. **With this publication we aim to make sure that all clinical trial data hitherto collected (unpublished or published) will be of use, regardless of whether the target sample size of each trial was reached or not. We invite your core investigator team as co-authors.** The manuscript will be shared with all co-authors for comments and the finalized manuscript will be uploaded as a preprint at medRxiv in parallel with submission to a peer-reviewed medical journal such as JAMA or the BMJ.

Thank you for considering our request! We kindly ask for your answer **before July 7**. If you are interested in collaborating, but are uncertain whether the data may be shared before July 7, please respond as soon as possible. Should you have any questions or comments, please let us know.

Best regards,

Cathrine Axfors, Andreas Schmitt, David Moher, Steve Goodman, John Ioannidis and Lars Hemkens for the COVID-evidence team

[www.covid-evidence.org](http://www.covid-evidence.org)

**Table S1. Group-level characteristics of randomized clinical trials evaluating hydroxychloroquine or chloroquine as treatment for COVID-19 not included in the meta-analysis.**

| Register ID          | Contact name              | Arms (n) | Treatment comparisons               |                   | Targeted sample size | Location      | Setting    | Trial status       |
|----------------------|---------------------------|----------|-------------------------------------|-------------------|----------------------|---------------|------------|--------------------|
|                      |                           |          | Experimental group (HCQ or CQ)      | Control group     |                      |               |            |                    |
| NCT04315948          | Ader                      | 4        | HCQ                                 | SoC               | 3100                 | International | Inpatient  | Recruiting         |
| NCT04391127          | Arreola Guerra            | 5        | HCQ                                 | Placebo           | 200                  | Mexico        | Inpatient  | Recruiting         |
| NCT04351516          | Bitzer                    | 2        | HCQ                                 | Placebo           | 350                  | Germany       | Outpatient | Recruiting         |
| NCT04359953          | Blanc                     | 4        | HCQ                                 | Soc               | 1600                 | France        | Inpatient  | Not yet recruiting |
| ISRCTN86534580       | Butler                    | 2        | HCQ                                 | SoC               | 3000                 | Europe        | Inpatient  | Recruiting         |
| ChiCTR2000029939     | Cai                       | 2        | CQ                                  | SoC               | 100                  | China         | Inpatient  | Recruiting         |
| EUCTR2020-001271-33  | CHU Angers study team     | 2        | HCQ                                 | Placebo           | 1300                 | France        | Inpatient  | Completed          |
| EUCTR2020-001270-29  | Sanofi Aventis study team | 2        | HCQ                                 | SoC               | 350                  | International | Inpatient  | Discontinued       |
| ChiCTR2000030031     | Deng                      | 2        | CQ                                  | Placebo           | 120                  | China         | Inpatient  | Discontinued       |
| NCT04331600          | Duda-Sikula               | 2        | CQ                                  | SoC               | 400                  | Poland        | Inpatient  | Recruiting         |
| NCT04328272          | Farooq                    | 3        | HCQ                                 | Placebo           | 75                   | Asia          | Unclear    | Not yet recruiting |
| NCT04339816          | František                 | 3        | HCQ                                 | Placebo           | 240                  | Europe        | Inpatient  | Recruiting         |
| NCT04353037          | Griffin                   | 4        | HCQ                                 | Placebo           | 850                  | United States | Outpatient | Recruiting         |
| NCT04349592          | Harris                    | 3        | HCQ + Placebo                       | Placebo           | 456                  | Qatar         | Inpatient  | Not yet recruiting |
| ChiCTR2000029761     | Huang                     | 4        | HCQ (3 arms with 3 different dosis) | SoC               | 240                  | China         | Inpatient  | Discontinued       |
| ChiCTR2000029762     | Huang                     | 2        | HCQ                                 | SoC               | 60                   | China         | Inpatient  | Discontinued       |
| EUCTR 2020-001469-35 | Jankowska                 | 2        | CQ + telemedicine                   | telemedicine      | 400                  | Poland        | Outpatient | Recruiting         |
| NCT04354428          | Johnston                  | 3        | HCQ + Placebo                       | Placebo + Placebo | 630                  | United States | Outpatient | Recruiting         |
| NCT04307693          | Kim                       | 3        | HCQ                                 | SoC               | 150                  | Asia          | Inpatient  | Discontinued       |
| 2020-001366-11       | Lagos                     | 5        | HCQ                                 | SoC               | 10000                | International | Inpatient  | Recruiting         |
| NCT04394442          | Lutfy                     | 2        | HCQ                                 | SoC               | 200                  | Saudi Arabia  | Unclear    | Recruiting         |
| ChiCTR2000029837     | Mao                       | 2        | CQ                                  | Placebo           | 120                  | China         | Inpatient  | Discontinued       |
| ChiCTR2000029826     | Mao                       | 2        | CQ                                  | Placebo           | 45                   | China         | Inpatient  | Discontinued       |
| EUCTR 2020-001587-29 | Menéndez                  | 2        | HCQ                                 | Placebo           | 714                  | Spain         | Inpatient  | Recruiting         |

|                      |                |   |                                         |                    |      |               |            |                    |
|----------------------|----------------|---|-----------------------------------------|--------------------|------|---------------|------------|--------------------|
| NCT04329611          | Metz           | 2 | HCQ                                     | Placebo            | 1660 | Canada        | Inpatient  | Recruiting         |
| NCT04332991          | Oldmixon       | 2 | HCQ                                     | Placebo            | 510  | United States | Inpatient  | Discontinued       |
| NCT04342169          | Pacchia        | 2 | HCQ                                     | Placebo            | 400  | United States | Outpatient | Recruiting         |
| NCT04353271          | Richards       | 2 | HCQ                                     | Placebo            | 58   | United States | Outpatient | Not yet recruiting |
| NCT04351191          | Sarwar         | 4 | HCQ (2arms with different dosis)<br>CQ  | Placebo            | 400  | Pakistan      | Unclear    | Recruiting         |
| NCT04346667          | Sarwar         | 4 | HCQ (2 arms with different dosis)<br>CQ | Placebo<br>Placebo | 400  | Pakistan      | Outpatient | Recruiting         |
| NCT04330586          | Song           | 3 | HCQ + Ciclesonide                       | Ciclesonide        | 141  | Korea         | Inpatient  | Not yet recruiting |
| ChiCTR2000030987     | Tong           | 3 | CQ + Favipiravir                        | Favipiravir        | 150  | China         | Inpatient  | Recruiting         |
| EUCTR 2020-001265-36 | UCD study team | 3 | HCQ                                     | SoC                | 267  | Ireland       | Unclear    | Recruiting         |
| ChiCTR2000030417     | Xu             | 2 | CQ                                      | Placebo            | 30   | China         | Inpatient  | Discontinued       |
| ChiCTR2000029740     | Zhang          | 2 | HCQ                                     | SoC                | 78   | China         | Inpatient  | Recruiting         |
| ChiCTR2000029992     | Zhenyu         | 3 | HCQ<br>CQ                               | SoC<br>SoC         | 100  | China         | Inpatient  | Not yet recruiting |

---

\* Trial includes more treatment arms than reported here; target sample size refers to all arms. Abbreviations: Chloroquine (CQ), hydroxychloroquine (HCQ), standard of care (SoC). Trial marked as “International” involves centers in multiple countries.

**Table S2A. Subgroup analyses for random-effects meta-analysis on mortality for treatment of COVID-19 with Hydroxychloroquine.**

| Subgroup                         | Trials (n) | Patients (n) | OR (95% CI)        | P value, test for interaction |
|----------------------------------|------------|--------------|--------------------|-------------------------------|
| Setting                          |            |              |                    |                               |
| ICU                              | 1          | 142          | 1.04 (0.49, 2.18)  | 0.99                          |
| Inpatient                        | 19         | 6709         | 1.08 (0.98, 1.19)  |                               |
| Outpatient                       | 4          | 808          | 1.01 (0.06, 16.28) |                               |
| Published                        |            |              |                    |                               |
| Yes                              | 10         | 6306         | 1.1 (1.07, 1.13)   | 0.32                          |
| No                               | 14         | 1353         | 0.96 (0.71, 1.3)   |                               |
| Control                          |            |              |                    |                               |
| Standard of care                 | 15         | 6558         | 1.1 (1.01, 1.2)    | 0.19                          |
| Placebo                          | 9          | 1101         | 0.88 (0.55, 1.41)  |                               |
| COVID-19 diagnostic confirmation |            |              |                    |                               |
| Confirmed                        | 20         | 1862         | 0.94 (0.66, 1.32)  | 0.31                          |
| Confirmed or suspected           | 4          | 5797         | 1.1 (1.07, 1.13)   |                               |
| Dose*                            |            |              |                    |                               |
| High                             | 2          | 4858         | 1.10 (0.96, 1.25)  | 0.36                          |
| Low                              | 22         | 2801         | 0.97 (0.73, 1.30)  |                               |

\* High dose:  $\geq 1600$  mg on day 1 and  $\geq 800$  mg from day 2. Low dose:  $< 1600$  mg on day 1 or  $< 800$  from day 2.

**Table S2B. Sensitivity analysis for meta-analysis for mortality for treatment of COVID-19 with Hydroxychloroquine using different methods of combination.**

|         | <b>Reciprocal of contrasting arm added to zero events</b> | <b>Excluding trials with zero deaths in one or both arms</b> | <b>Trials with more than 50 participants*</b> | <b>Arcsine difference</b>               |
|---------|-----------------------------------------------------------|--------------------------------------------------------------|-----------------------------------------------|-----------------------------------------|
|         | <b>n = 24</b>                                             | <b>n = 11</b>                                                | <b>n = 13</b>                                 | <b>n = 24</b>                           |
|         | <b>OR (95% CI), P, Tau<sup>2</sup></b>                    |                                                              |                                               | <b>ASD (95% CI), P, Tau<sup>2</sup></b> |
| HKSJ-PM | 1.08 (0.99, 1.18); 0, 0                                   | 1.08 (1, 1.16); 0, 0                                         | 1.08 (1, 1.17); 0, 0                          | 0.01 (-0.01, 0.03); 0, 0                |
| HKSJ-SJ | 1.04 (0.75, 1.43); 0, 0.49                                | 1.03 (0.9, 1.18); 0, 0.02                                    | 0.99 (0.82, 1.19); 0, 0.1                     | 0 (-0.03, 0.03); 0, 0                   |
| MH-DSL  | 1.08 (0.95, 1.23); 0, 0                                   | 1.08 (0.95, 1.23); 0, 0                                      | 1.08 (0.95, 1.23); 0, 0                       | 0.01 (-0.01, 0.03); 0, 0                |
| Peto    | 1.09 (0.95, 1.23); 0, 0                                   | 1.08 (0.95, 1.23); 0, 0                                      | 1.08 (0.94, 1.22); 0, 0                       | 0.01 (-0.01, 0.03); 0, 0                |

HKSJ-PM = Hartung-Knapp-Sidik-Jonkman adjustment for random effects model, Paule-Mandel estimator for tau<sup>2</sup>;  
HKSJ-SJ = Hartung-Knapp-Sidik-Jonkman adjustment for random effects model, Sidik-Jonkman estimator for tau<sup>2</sup>;  
MH-DSL = Mantel-Haenszel method for random effects model, DerSimonian-Laird estimator for tau<sup>2</sup>;  
PETO = Peto method with random effects model, Paule-Mandel estimator for tau<sup>2</sup>;

\* Zero events were corrected by adding the reciprocal of the size of the contrasting study arm

**Figure S1A. Forest plot of HKSJ-SJ model.** Zero events were corrected by adding the reciprocal of the size of the contrasting study arm.

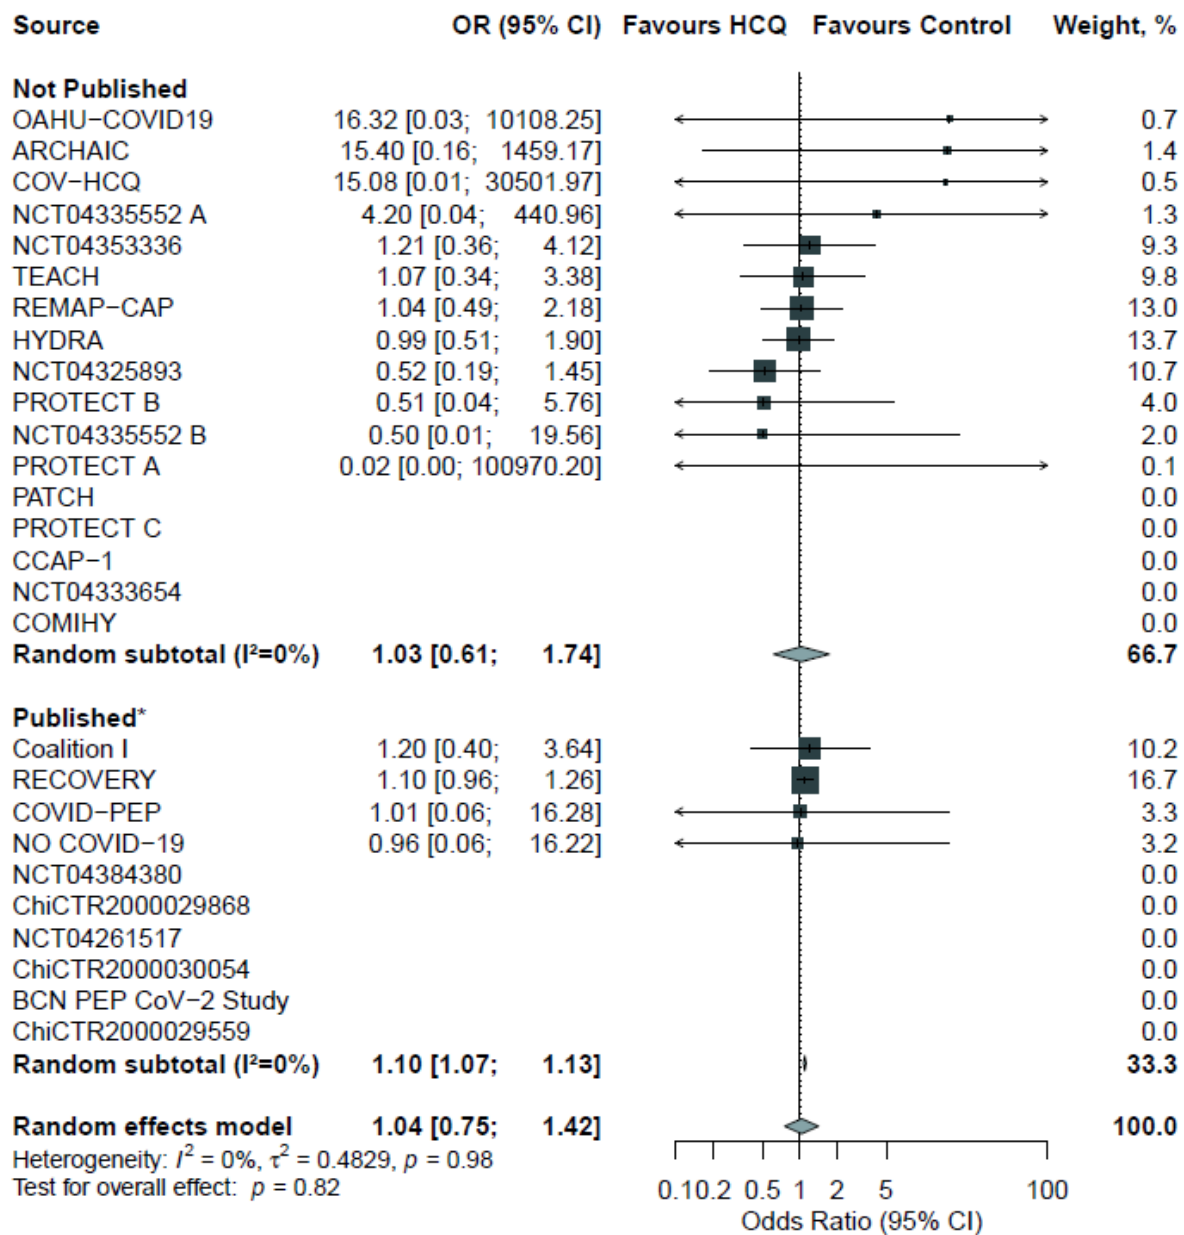



**Figure S1B. Forest plot of MH-DSL model.** Zero events were corrected by adding the reciprocal of the size of the contrasting study arm.

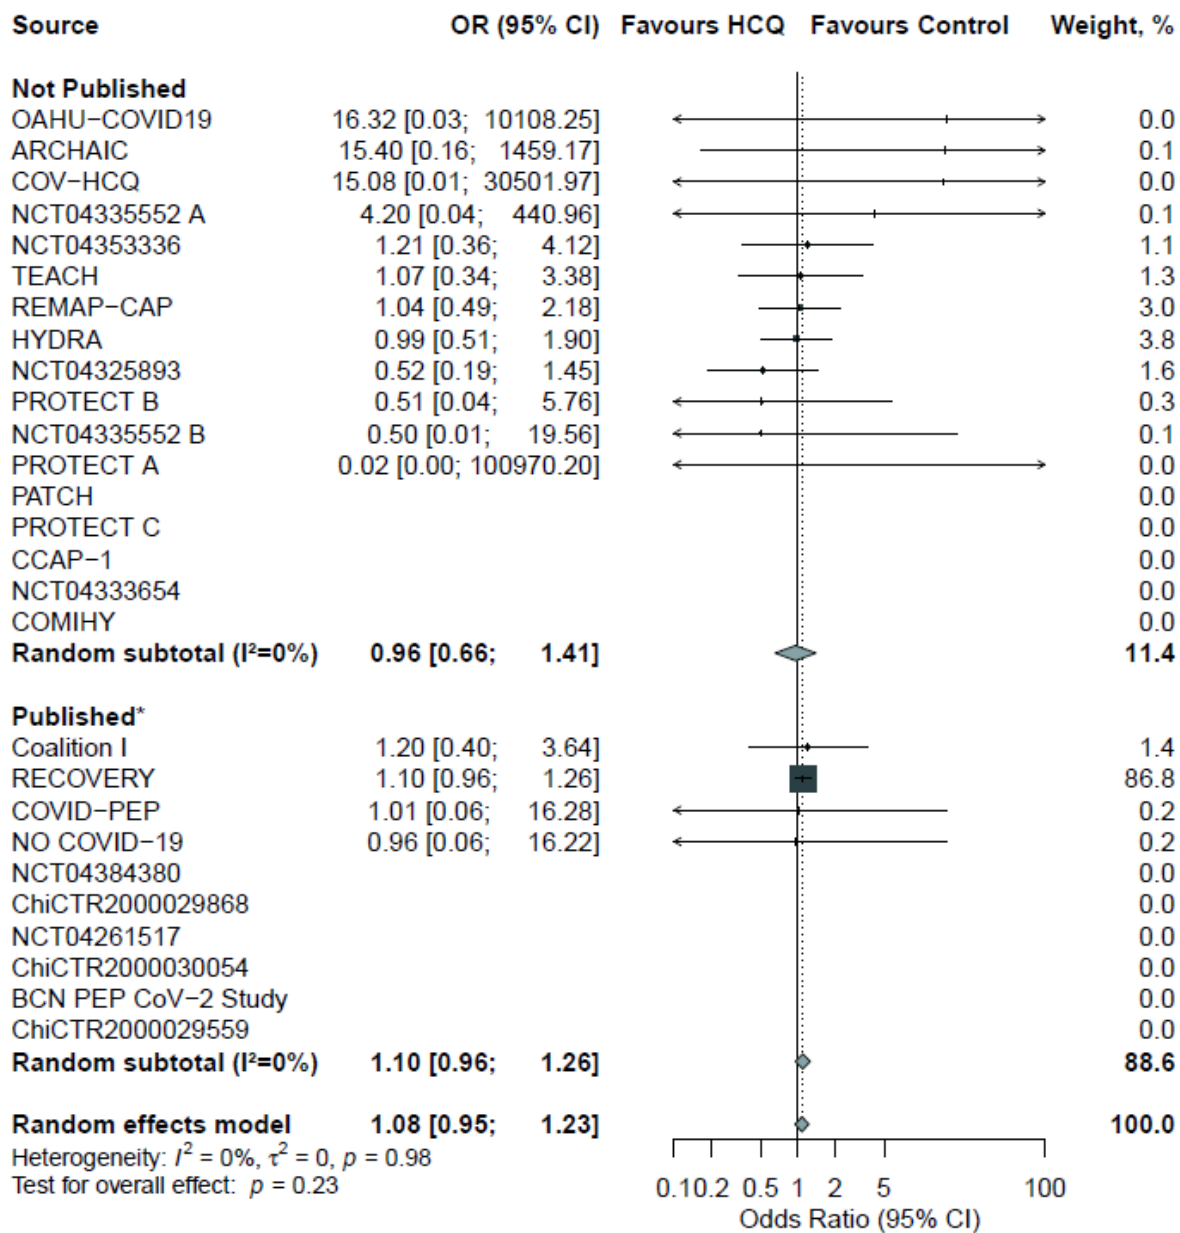

**Figure S1C. Forest plot of Peto model.** Zero events were corrected by adding the reciprocal of the size of the contrasting study arm.

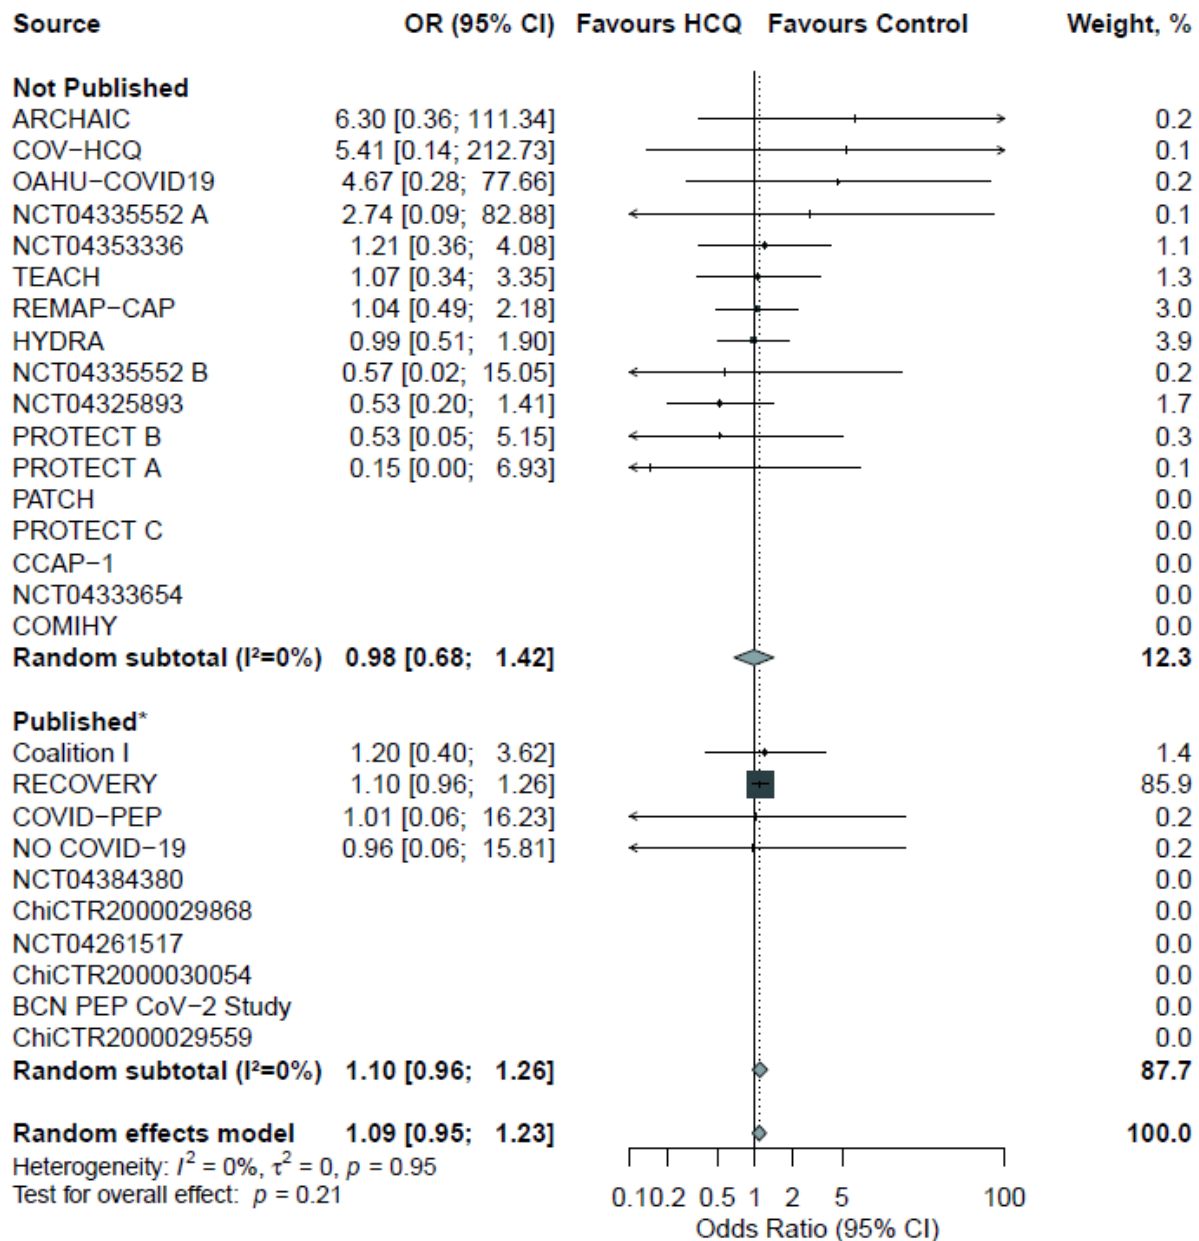

Supplement: Supplementary file [file 2020.09.16.20194571-1.pdf]
